# Supplementary material for: Suppression of ion migration in lead-free zero-dimensional perovskite FA3BiBr6 single crystals for X-ray detection
Source: Royal Society of Chemistry journal article supplement (doi:10.1039/d4tc00375f), 2024-01-01
Supplement: d4tc00375f1.pdf [file d4tc00375f1.pdf]

Supporting Information

## Suppression of Ion Migration in Lead-free Zero-dimensional Perovskite $\text{FA}_3\text{BiBr}_6$ Single Crystals for X-ray Detection

Kangyu Ji,<sup>a</sup> Wenjun Wang,<sup>\*b</sup> Yuanbo Ma,<sup>c</sup> Zihan Wang,<sup>c</sup> Xuepeng Liu,<sup>a</sup> Jiajiu Ye,<sup>c</sup> Shu Zhang,<sup>\*d</sup> Xu Pan,<sup>\*c</sup> Songyuan Dai<sup>\*a</sup>

<sup>a</sup>School of New Energy, North China Electric Power University, Beijing 102206, China. E-mail: sydai@ncepu.edu.cn

<sup>b</sup>Department of Microelectronics, Institute of Science, Hubei University of Technology, Wuhan 430068, China

<sup>c</sup>Chinese Acad Sci, Inst Solid State Phys, Hefei Inst Phys Sci, Hefei 230031, Peoples R China

<sup>d</sup>Qingdao Institute of Bioenergy and Bioprocess Technology, Chinese Academy of Sciences, Qingdao 266101 P.R. China

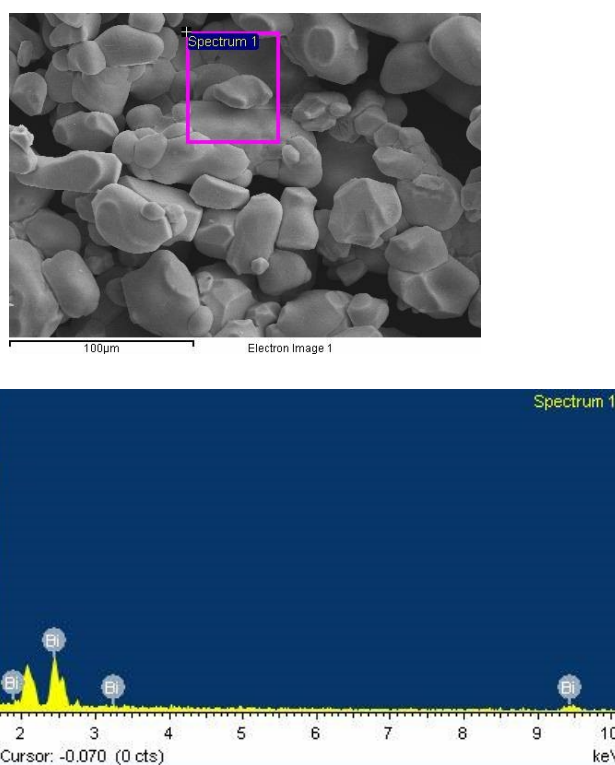

**Figure S1.** Single crystal ground into powder detection EDS.

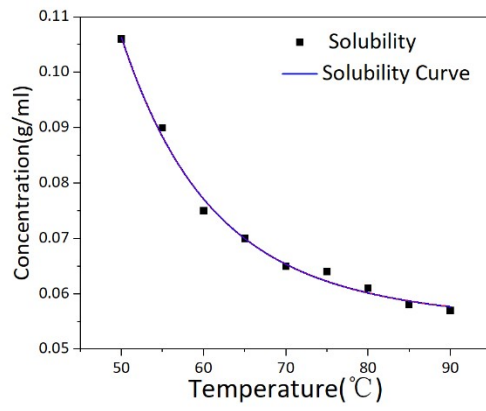

**Figure S2.** The solubility curve of  $\text{FA}_3\text{BiBr}_6$  SC powder in GBL solvent.

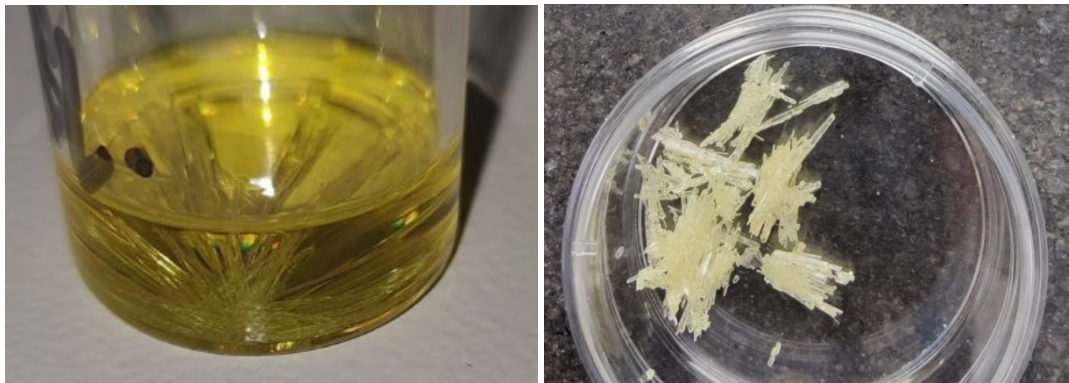

**Figure S3.**  $\text{FA}_3\text{BiBr}_6$  crystals growth at  $75\text{ }^\circ\text{C}$  and crystals after vacuum drying.

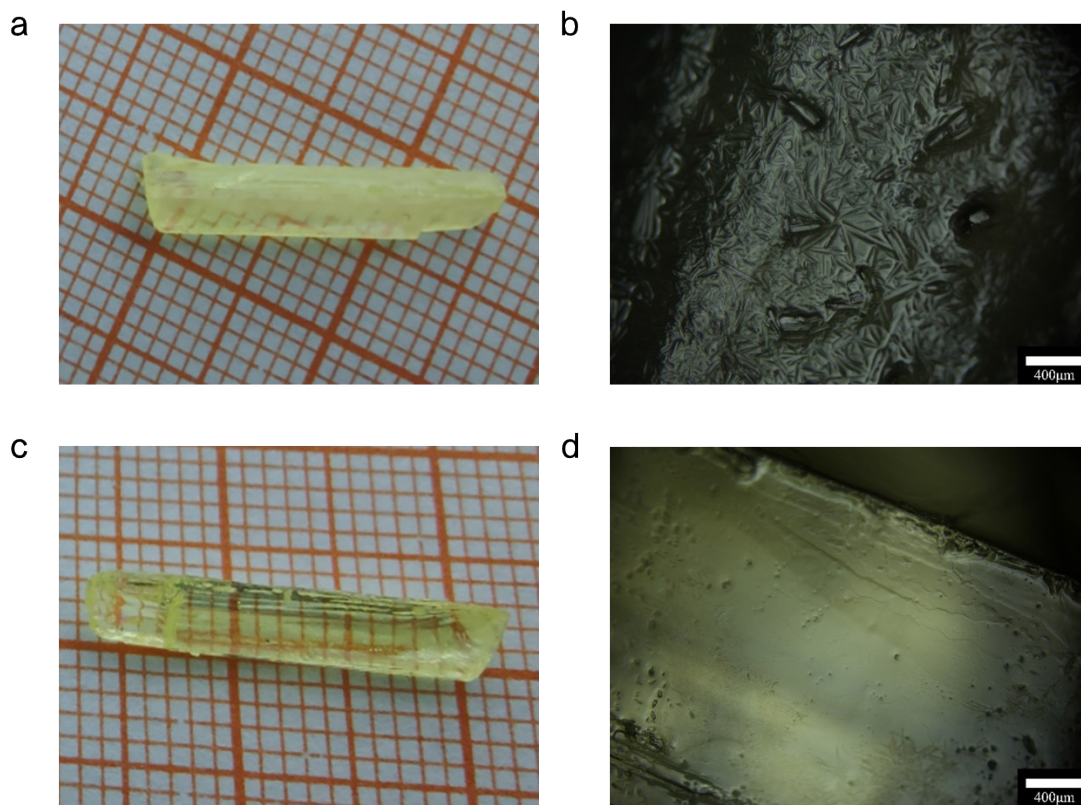

**Figure S4.** (a) Photograph of FA<sub>3</sub>BiBr<sub>6</sub> PSCs dried directly without washing and (b) 80X magnification of the surface of PSCs under a microscope. (c) Photograph of FA<sub>3</sub>BiBr<sub>6</sub> PSCs dried after cleaning with GBL and (d) 80X magnification of the surface of PSCs under microscope

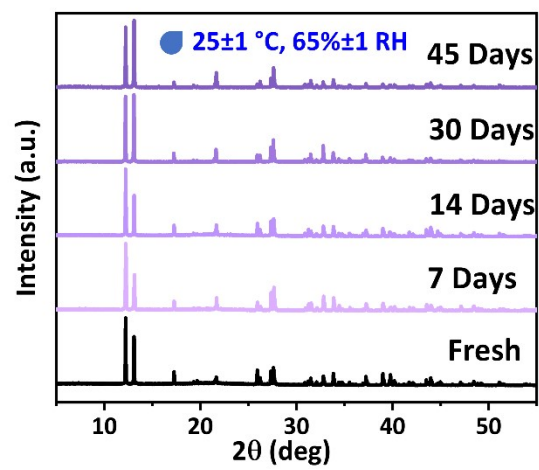

**Figure S5.** PXRD pattern of FA<sub>3</sub>BiBr<sub>6</sub> placed in 65% humidity and dry environment for 45 days.

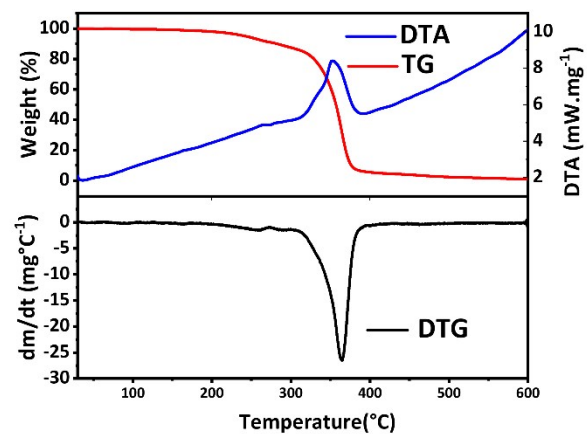

**Figure S6.** TG, DTG and DTA data for  $\text{FA}_3\text{BiBr}_6$  (TG = thermogravimetric analysis (mass loss vs. temperature) plot, DTG = thermogravimetric analysis first order derivative, DTA = free carrier stat).

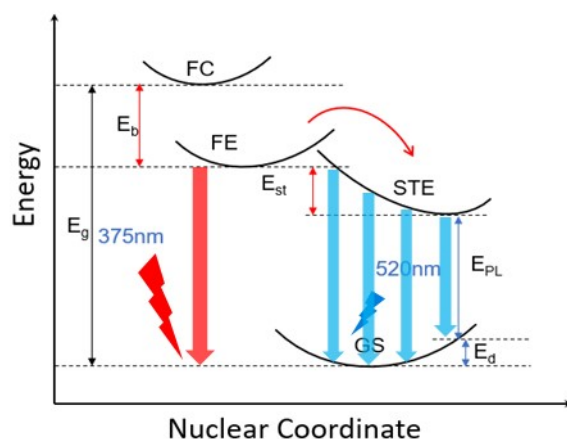

**Figure S7.** Schematic of the energy level structure of STE (FC = free carrier state, FE = free exciton state, STE = self-trapped exciton state, GS = ground state).

Figure S7 illustrates the emission process of the two types of excitons. The excitons are initially excited to the conduction band and subsequently relax at the edge of the conduction band. At this point, the excitons are in the free exciton state (FE). When the excitation energy surpasses  $E_g$  of 2.75 eV in  $\text{FA}_3\text{BiBr}_6$ , the free exciton pairs consisting of holes and electrons overcome the binding energy ( $E_b$ ) restriction of excitons. The energy levels of these carriers are situated in the free-carrier state (FC). The emission of free excitons (FEs) involves a direct transition from the free exciton state to the ground state (GS), as indicated by the red arrow in Figure 4c. However, the presence of electron-phonon coupling leads to the loss of energy by high-level FEs, causing their transformation into low-level STEs. This energy loss is referred to as self-trapping energy ( $E_{st}$ ).<sup>1</sup> Additionally, the energy of the ground state is influenced by lattice deformation, resulting in an increase known as lattice deformation energy ( $E_d$ ). Emission of STEs from different states of STE to different states of GS was affected by  $E_{st}$  and  $E_d$ , as illustrated by the blue arrows in Figure S7. This phenomenon also accounts for the broad-spectrum emission of STEs and the

large Stokes shift observed in  $\text{FA}_3\text{BiBr}_6$ . The emission energy ( $E_{\text{PL}}$ ) can be calculated using the equation  $E_{\text{PL}} = E_{\text{g}} - E_{\text{b}} - E_{\text{st}} - E_{\text{d}}$ .



**Table S1.** EDS test report

| Element | App<br>Conc. | Intensity<br>Corn. | Weight% | Weight%<br>Sigma | Atomic% |
|---------|--------------|--------------------|---------|------------------|---------|
| Br L    | 12.87        | 0.9312             | 69.86   | 1.02             | 85.84   |
| Bi M    | 3.71         | 0.6229             | 30.14   | 1.02             | 14.16   |
| Totals  |              |                    | 100     |                  |         |

**Table S2.** Crystal data and structure refinement for FA<sub>3</sub>BiBr<sub>6</sub>

| Empirical formula                           | C <sub>3</sub> H <sub>15</sub> BiBr <sub>6</sub> N <sub>6</sub> |
|---------------------------------------------|-----------------------------------------------------------------|
| Formula weight                              | 823.65                                                          |
| Temperature/K                               | 300.00                                                          |
| Crystal system                              | tetragonal                                                      |
| Space group                                 | P4 <sub>2</sub> /m                                              |
| a/Å                                         | 10.3603(6)                                                      |
| b/Å                                         | 10.3603(6)                                                      |
| c/Å                                         | 9.0922(6)                                                       |
| $\alpha$ /°                                 | 90                                                              |
| $\beta$ /°                                  | 90                                                              |
| $\gamma$ /°                                 | 90                                                              |
| Volume/Å <sup>3</sup>                       | 975.92(13)                                                      |
| Z                                           | 2                                                               |
| $\rho_{\text{calc}}$ /cm <sup>3</sup>       | 2.803                                                           |
| $\mu$ /mm <sup>-1</sup>                     | 21.305                                                          |
| F(000)                                      | 736.0                                                           |
| Crystal size/mm <sup>3</sup>                | 0.26 × 0.23 × 0.17                                              |
| Radiation                                   | MoK $\alpha$ ( $\lambda$ = 0.71073)                             |
| 2 $\theta$ range for data collection/°      | 5.56 ~ 61.054                                                   |
| Index ranges                                | -13 ≤ h ≤ 14, -14 ≤ k ≤ 14, -12 ≤ l ≤ 12                        |
| Reflections collected                       | 27474                                                           |
| Independent reflections                     | 1577 [ $R_{\text{int}}$ = 0.1223, $R_{\text{sigma}}$ = 0.0509]  |
| Data/restraints/parameters                  | 1577/64/76                                                      |
| Goodness-of-fit on F <sup>2</sup>           | 1.035                                                           |
| Final R indexes [ $I \geq 2\sigma(I)$ ]     | $R_1$ = 0.0451, $wR_2$ = 0.0980                                 |
| Final R indexes [all data]                  | $R_1$ = 0.0945, $wR_2$ = 0.1152                                 |
| Largest diff. peak/hole / e Å <sup>-3</sup> | 0.75/-0.93                                                      |

**Table S3.** Selected bond lengths for FA<sub>3</sub>BiBr<sub>6</sub>

| <b>Atom</b> | <b>Atom</b>      | <b>Length/Å</b> | <b>Atom</b> | <b>Atom</b>      | <b>Length/Å</b> |
|-------------|------------------|-----------------|-------------|------------------|-----------------|
| <b>Bi1</b>  | Br1              | 2.8387(12)      | <b>Bi1</b>  | Br2 <sup>1</sup> | 2.8517(8)       |
| <b>Bi1</b>  | Br1 <sup>1</sup> | 2.8388(12)      | <b>N1</b>   | C1               | 1.386(10)       |
| <b>Bi1</b>  | Br2 <sup>2</sup> | 2.8517(8)       | <b>N2</b>   | C1               | 1.334(10)       |
| <b>Bi1</b>  | Br2 <sup>3</sup> | 2.8517(8)       | <b>N3</b>   | C2               | 1.4000(11)      |
| <b>Bi1</b>  | Br2              | 2.8517(8)       | <b>N4</b>   | C2               | 1.351(10)       |

**Table S4.** Selected bond angles (deg) for FA<sub>3</sub>BiBr<sub>6</sub>

| <b>Atom</b>            | <b>Atom</b> | <b>Atom</b>      | <b>Angle/°</b> | <b>Atom</b>      | <b>Atom</b> | <b>Atom</b>      | <b>Angle/°</b> |
|------------------------|-------------|------------------|----------------|------------------|-------------|------------------|----------------|
| <b>Br1</b>             | Bi1         | Br1 <sup>1</sup> | 180.0          | Br2 <sup>3</sup> | Bi1         | Br2 <sup>2</sup> | 180.00(3)      |
| <b>Br1</b>             | Bi1         | Br2 <sup>2</sup> | 89.14(3)       | Br2 <sup>2</sup> | Bi1         | Br2              | 89.23(5)       |
| <b>Br1<sup>1</sup></b> | Bi1         | Br2              | 89.14(3)       | Br2 <sup>1</sup> | Bi1         | Br2 <sup>2</sup> | 90.77(5)       |
| <b>Br1<sup>1</sup></b> | Bi1         | Br2 <sup>3</sup> | 89.14(3)       | Br2 <sup>3</sup> | Bi1         | Br2              | 90.77(5)       |
| <b>Br1<sup>1</sup></b> | Bi1         | Br2 <sup>1</sup> | 90.86(3)       | Br2 <sup>1</sup> | Bi1         | Br2              | 180.0          |
| <b>Br1</b>             | Bi1         | Br2              | 90.86(3)       | Br2 <sup>1</sup> | Bi1         | Br2 <sup>3</sup> | 89.23(5)       |
| <b>Br1</b>             | Bi1         | Br2 <sup>3</sup> | 90.86(3)       | N2               | C1          | N1               | 119(2)         |

**Table S5.** The dark current drift values of perovskite material

| Materials                                                                 | Dimension | Applied Electric Field (V cm <sup>-1</sup> ) | Dark Current Drift (nA cm <sup>-1</sup> s <sup>-1</sup> V <sup>-1</sup> ) | Device Type     | Reference        |
|---------------------------------------------------------------------------|-----------|----------------------------------------------|---------------------------------------------------------------------------|-----------------|------------------|
| MAPbI <sub>3</sub> single crystal                                         | 3D        | 100                                          | 1.4×10 <sup>-4</sup>                                                      | vertical        | 2                |
| CsPbBr <sub>3</sub> single crystal                                        | 3D        | 2000                                         | 1.9×10 <sup>-4</sup>                                                      | vertical        | 3                |
| MAPbBr <sub>3</sub> single crystal                                        | 3D        | 20                                           | 1.2×10 <sup>-3</sup>                                                      | vertical        | 4                |
| MAPbBr <sub>3-n</sub> Cl <sub>n</sub> /CsPbBr <sub>3</sub> Heterojunction | 3D        | 1250                                         | 3.92 × 10 <sup>-4</sup>                                                   | vertical        | 5                |
| BiOBr passivated Cs <sub>2</sub> AgBiBr <sub>6</sub> film                 | 3D        | 5000                                         | 7.4×10 <sup>-5</sup>                                                      | vertical        | 6                |
| BA <sub>2</sub> PbI <sub>4</sub> /MAPbI <sub>3</sub>                      | 2D/3D     | 125                                          | 4.84 × 10 <sup>-5</sup>                                                   | vertical        | 7                |
| (F-PEA) <sub>2</sub> PbI <sub>4</sub>                                     | 2D        | 1333                                         | 4.9 × 10 <sup>-8</sup>                                                    | vertical        | 8                |
| (PEA) <sub>2</sub> PbI <sub>4</sub> single crystal                        | 2D        | 4545                                         | 1.9 × 10 <sup>-7</sup>                                                    | planar          | 9                |
| (PEA) <sub>2</sub> PbBr <sub>4</sub> single crystal                       | 2D        | 4545                                         | 6.2 × 10 <sup>-6</sup>                                                    | planar          |                  |
| δ-FAPbI <sub>3</sub>                                                      | 1D        | 100                                          | 3.43 × 10 <sup>-7</sup>                                                   | vertical        | 10               |
| MA <sub>3</sub> Bi <sub>2</sub> I <sub>9</sub>                            | 0D        | 4545                                         | 5 × 10 <sup>-10</sup>                                                     | planar          | 9                |
| Cs <sub>4</sub> PbBr <sub>6</sub>                                         | 0D        | 6667                                         | 5.6 × 10 <sup>-11</sup>                                                   | planar          | 11               |
| Cs <sub>3</sub> Bi <sub>2</sub> I <sub>9</sub>                            | 0D        | 100                                          | 1.67 × 10 <sup>-8</sup>                                                   | planar          | 12               |
| <b>FA<sub>3</sub>BiBr<sub>6</sub></b>                                     | <b>0D</b> | <b>200</b>                                   | <b>3.73×10<sup>-7</sup></b>                                               | <b>vertical</b> | <b>This work</b> |

**Table S6. Perovskite Br-Br spacing in different dimensions**

| <b>Component</b>                                  | <b>Dimension</b> | <b>Br-Br Maximum<br/>distance (Å)</b> | <b>Br-Br Minimum<br/>distance (Å)</b> | <b>Reference</b> |
|---------------------------------------------------|------------------|---------------------------------------|---------------------------------------|------------------|
| <b>FAPbBr<sub>3</sub></b>                         | 3D               | 4.2404                                | 4.2404                                | <sup>13</sup>    |
| <b>FA<sub>3</sub>Bi<sub>2</sub>Br<sub>9</sub></b> | 2D               | 5.938                                 | 3.889                                 | <sup>14</sup>    |
| <b>FA<sub>3</sub>BiBr<sub>6</sub></b>             | 0D               | 6.432                                 | 4.0533                                | <b>This work</b> |

**Table S7.** The activation energy values of perovskite materials

| Materials                                                                                             | Dimension | Activation Energy (eV)                       | Device Type | Reference        |
|-------------------------------------------------------------------------------------------------------|-----------|----------------------------------------------|-------------|------------------|
| MAPbBr <sub>3</sub>                                                                                   | 3D        | 0.062                                        | SC          | 15               |
| CsPbBr <sub>3</sub>                                                                                   | 3D        | 0.228                                        | SC          | 16               |
| MAPbBr <sub>3</sub>                                                                                   | 3D        | 0.127                                        | SC          | 17               |
| MAPbBr <sub>3</sub>                                                                                   | 3D        | 0.25                                         | film        | 18               |
| Cs <sub>2</sub> AgBiBr <sub>3</sub>                                                                   | 3D        | 0.348                                        | SC          | 17               |
| Cs <sub>3</sub> Bi <sub>2</sub> Br <sub>9</sub>                                                       | 2D        | 0.15                                         | film        | 19               |
| [(CH <sub>3</sub> ) <sub>2</sub> NH <sub>2</sub> ] <sub>2</sub> PdBr <sub>4</sub>                     | 2D        | 0.27                                         | SC          | 20               |
| BA <sub>2</sub> MA <sub>2</sub> Pb <sub>3</sub> Br <sub>10</sub>                                      | 2D        | 0.052                                        | SC          | 21               |
| PEA <sub>2</sub> Pb(Br <sub>0.5</sub> I <sub>0.5</sub> ) <sub>4</sub>                                 | 2D        | 0.226                                        | film        |                  |
| PEA <sub>2</sub> MA <sub>5</sub> Pb <sub>6</sub> (Br <sub>0.5</sub> I <sub>0.5</sub> ) <sub>19</sub>  | 2D        | 0.213                                        | film        | 22               |
| PEA <sub>2</sub> MA <sub>9</sub> Pb <sub>10</sub> (Br <sub>0.5</sub> I <sub>0.5</sub> ) <sub>31</sub> | 2D        | 0.17                                         | film        |                  |
| δ-FAPbI <sub>3</sub>                                                                                  | 1D        | 0.52                                         | wafer       | 10               |
| Cs <sub>4</sub> PbI <sub>6</sub><br>single crystal                                                    | 0D        | 0.32                                         | vertical    | 23               |
| MA <sub>3</sub> Bi <sub>2</sub> I <sub>9</sub><br>single crystal                                      | 0D        | 0.46<br>(in-plane)<br>0.31<br>(out-of-plane) | vertical    | 24               |
| <b>FA<sub>3</sub>BiBr<sub>6</sub></b>                                                                 | <b>0D</b> | <b>0.54</b>                                  | <b>SC</b>   | <b>This work</b> |

SC=single crystal

## References

1. S. Li, J. Luo, J. Liu and J. Tang, *J Phys Chem Lett*, 2019, **10**, 1999-2007.
2. S. Yakunin, D. N. Dirin, Y. Shynkarenko, V. Morad, I. Cherniukh, O. Nazarenko, D. Kreil, T. Nauser and M. V. Kovalenko, *Nat. Photonics*, 2016, **10**, 585-589.
3. Y. H. He, L. Matei, H. J. Jung, K. M. McCall, M. Chen, C. C. Stoumpos, Z. F. Liu, J. A. Peters, D. Y. Chung, B. W. Wessels, M. R. Wasielewski, V. P. Dravid, A. Burger and M. G. Kanatzidis, *Nat. Commun.*, 2018, **9**.
4. W. Wei, Y. Zhang, Q. Xu, H. Wei, Y. Fang, Q. Wang, Y. Deng, T. Li, A. Gruverman, L. Cao and J. Huang, *Nat. Photonics*, 2017, **11**, 315-321.
5. F. C. Cui, P. Zhang, L. Z. Zhang, Y. Q. Hua, X. Sun, X. Li, G. D. Zhang and X. T. Tao, *Chem. Mater.*, 2022, DOI: 10.1021/acs.chemmater.2c02266.
6. B. Yang, W. C. Pan, H. D. Wu, G. D. Niu, J. H. Yuan, K. H. Xue, L. X. Yin, X. Y. Du, X. S. Miao, X. Q. Yang, Q. G. Xie and J. Tang, *Nat. Commun.*, 2019, **10**.
7. Y. R. Xiao, C. Z. Xue, X. Wang, Y. C. Liu, Z. Yang and S. Z. Liu, *ACS Appl. Mater. Interfaces*, 2022, **14**, 54867-54875.
8. H. Y. Li, J. M. Song, W. T. Pan, D. R. Xu, W. A. Zhu, H. T. Wei and B. Yang, *Adv. Mater.*, 2020, **32**.
9. Y. Liu, Z. Xu, Z. Yang, Y. Zhang, J. Cui, Y. He, H. Ye, K. Zhao, H. Sun, R. Lu, M. Liu, M. G. Kanatzidis and S. Liu, *Matter*, 2020, **3**, 180-196.
10. Z. H. Wang, S. J. Tie, H. Zhang, C. M. Wan, Z. Liang, H. F. Xu, X. J. Zheng, W. H. Zhang, D. Aldakov, P. Reiss, J. J. Ye and X. Pan, *ACS Nano*, 2023, **17**, 13638-13647.
11. H. Y. Chen, B. Y. An, G. Q. Peng, S. Wang, Z. H. Li, J. Sun, W. Lan, J. J. Fu, H. X. Wang, L. M. Ding and Z. W. Jin, *Advanced Optical Materials*, 2023, **11**.
12. L. J. Li, G. Ye, T. Y. Luo, X. Y. Chen, G. J. Zhang, H. Wu, L. Yang, W. F. Zhang and H. X. Chang, *J. Phys. Chem. C*, 2022, **126**, 3646-3652.
13. C. Li, E. J. Juarez-Perez and A. Mayoral, *Chem. Commun. (Camb.)*, 2022, **58**, 12164-12167.
14. R. Bhowal, A. A. Balaraman, M. Ghosh, S. Dutta, K. K. Dey and D. Chopra, *J. Am. Chem. Soc.*, 2021, **143**, 1024-1037.
15. V. K. Sharma, R. Mukhopadhyay, A. Mohanty, M. Tyagi, J. P. Embs and D. D. Sarma, *Journal of Physical Chemistry Letters*, 2020, **11**, 9669-9679.
16. M. L. Xia, J. H. Yuan, G. D. Niu, X. Y. Du, L. X. Yin, W. C. Pan, J. J. Luo, Z. G. Li, H. T. Zhao, K. H. Xue, X. S. Miao and J. Tang, *Adv. Funct. Mater.*, 2020, **30**.
17. W. Pan, H. Wu, J. Luo, Z. Deng, C. Ge, C. Chen, X. Jiang, W.-J. Yin, G. Niu, L. Zhu, L. Yin, Y. Zhou, Q. Xie, X. Ke, M. Sui and J. Tang, *Nat. Photonics*, 2017, **11**, 726-732.
18. L. McGovern, M. H. Futscher, L. A. Muscarella and B. Ehrler, *Journal of Physical Chemistry Letters*, 2020, **11**, 7127-7132.
19. J. H. Xu, J. P. Xu, S. B. Shi, W. H. Bian, J. Chen, Q. L. Zhu, Z. Wang, L. A. Kong, X. S. Zhang and L. Li, *Journal of Physical Chemistry Letters*, 2023, **14**, 5318-5327.
20. K. Trabelsi, N. Drissi, F. Hajlaoui, M. Zighrioui, A. Rhaïem, N. Audebrand, T. Roisnel and K. Karim, *Rsc Advances*, 2023, **13**, 23348-23358.



21. H. H. Tsai, D. Ghosh, E. Kinigstein, B. Dryzhakov, H. Driscoll, M. Owczarek, B. Hu, X. Y. Zhang, S. Tretiak and W. Y. Nie, *Nano Lett.*, 2023, **23**, 429-436.
22. J. Cho, P. S. Mathew, J. T. DuBose and P. V. Kamat, *Adv. Mater.*, 2021, **33**.
23. Q. Xu, C. Li, J. Nie, Y. Guo, X. Wang, B. H. Zhang and X. P. Ouyang, *Journal of Physical Chemistry Letters*, 2021, **12**, 287-293.
24. X. J. Zheng, W. Zhao, P. Wang, H. R. Tan, M. I. Saidaminov, S. J. Tie, L. G. Chen, Y. F. Peng, J. D. Long and W. H. Zhang, *Journal of Energy Chemistry*, 2020, **49**, 299-306.
